# Supplementary material for: Klebsiella Pneumoniae-Derived Outer Membrane Vesicles Impair Endothelial Function by inhibiting SIRT1
Source: Research Square preprint supplement (doi:10.21203/rs.3.rs-4002714/v1), 2024-03-14
Supplement: Supplementary file 1 [file 07354d04f472b15ff2f35705.docx]

**Supplementary Figures**

***Klebsiella Pneumoniae*-Derived Outer Membrane Vesicles Impair Endothelial Function by inhibiting SIRT1**

Xinxin Li1, Jinghua Cui2, Zanbo Ding2, Ziyan Tian2, Yang Liu1, Wen Zhao1, Xueying Chen1, Xinwei Li1, Jing Yuan2*, Huina Zhang1*


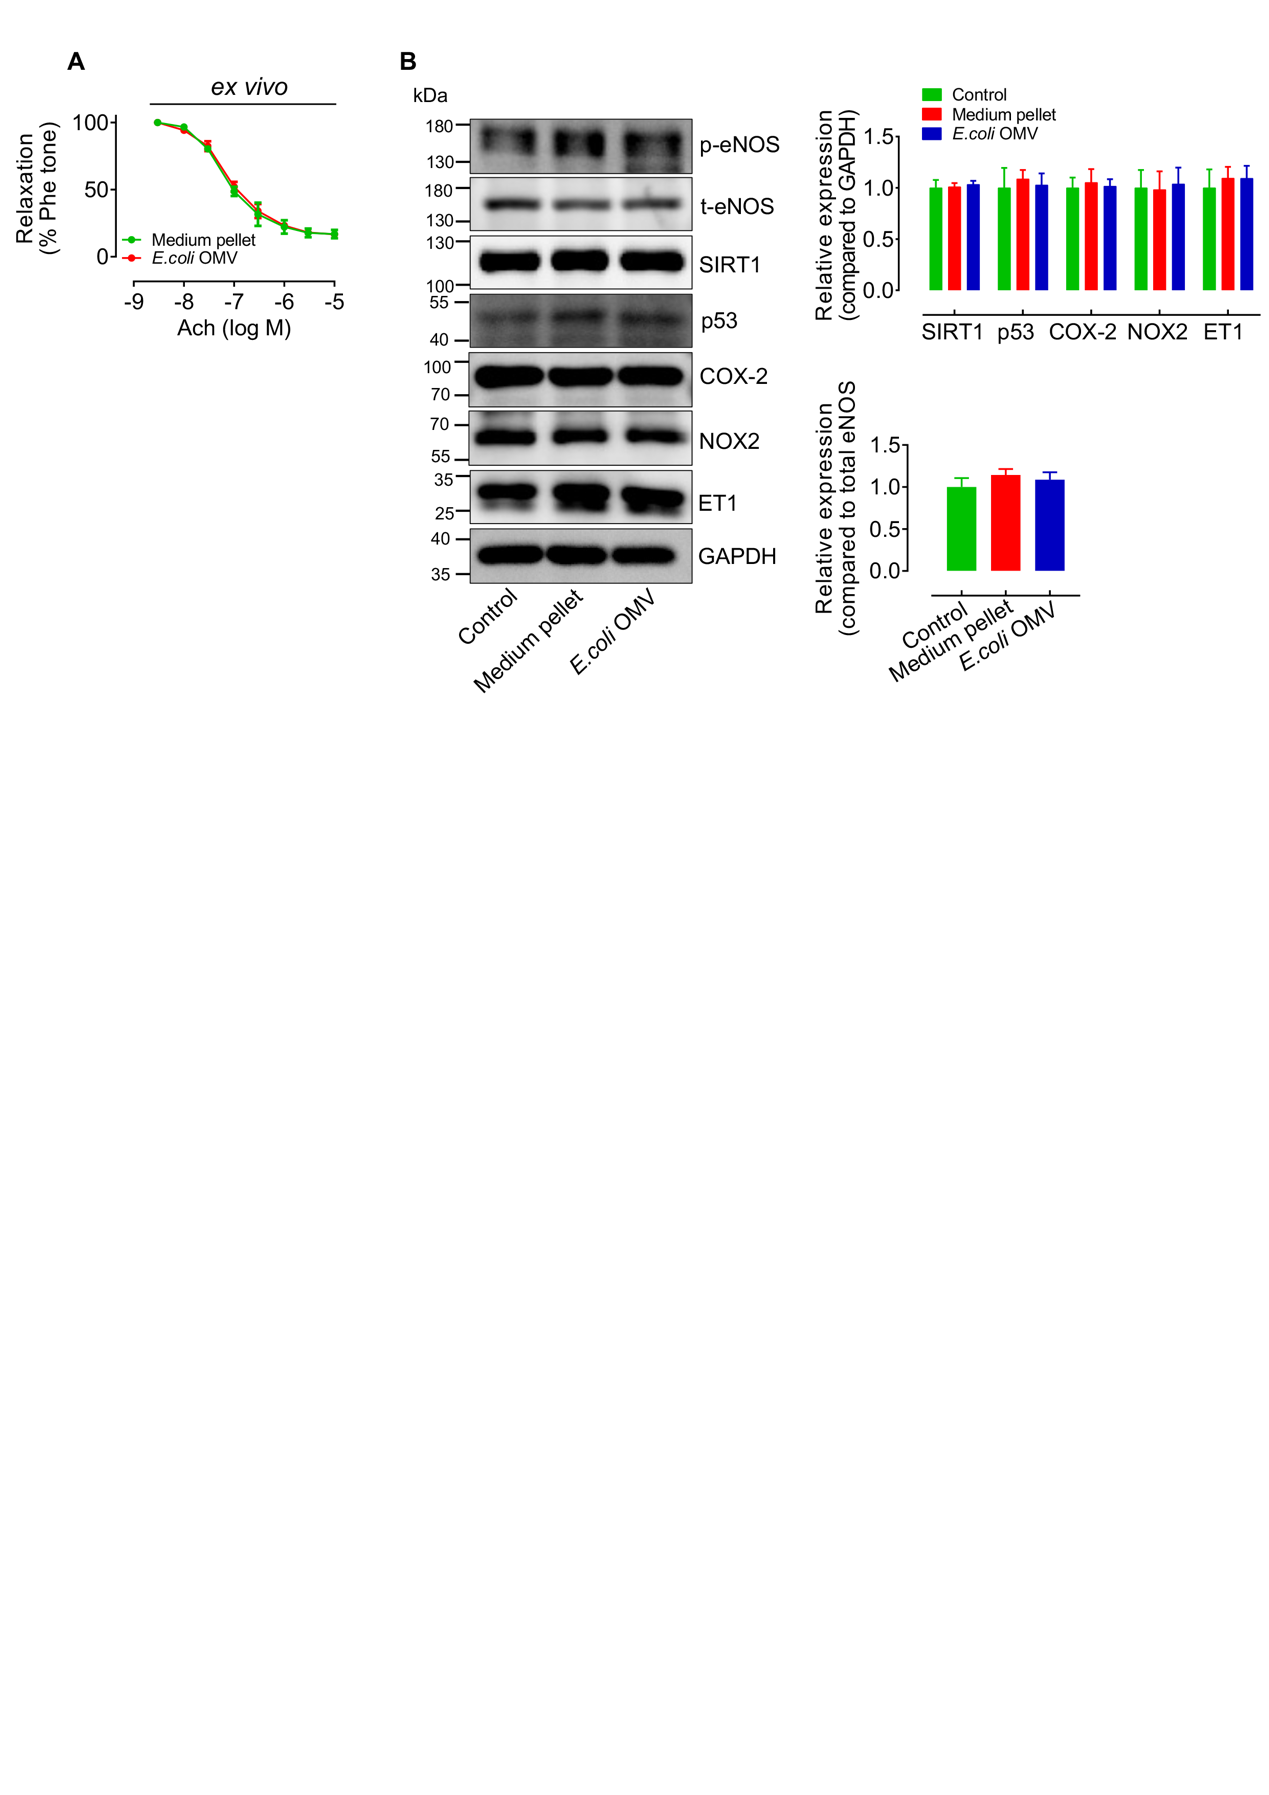


**Figure S1.** OMVs delivered from *E.coli* have no affect on endothelial-dependent relaxation and relative protein expression. **A.** *E.coli* OMVs 24-hour treatment did not affect endothelial-dependent relaxation in C57BL/6 aortas. **B.** *E.coli* OMVs 24-hour treatment did not change the protein levels of p-eNOS, SIRT1, p53, COX-2, NOX2, and ET-1 in endothelial cells. Results are presented as mean ± SD (n = 3). Densitometry analysis presented as the relative levels of SIRT1, p53, NOX2, ET-1, and COX-2 compared to GAPDH, and p-eNOS compared to t-eNOS.
